# Supplementary material for: An Individualized Recommendation for Controlled Ovary Stimulation Protocol in Women Who Received the GnRH Agonist Long-Acting Protocol or the GnRH Antagonist Protocol: A Retrospective Cohort Study
Source: PubMed Central journal article supplement (PMC9355571; doi:10.3389/fendo.2022.899000), 2022-07-22
Supplement: Table_1.pdf [file Table_1.pdf]

Supplemental Table1. Multivariable logistic regression analysis of live birth rate of the GnRH agonist long-acting protocol and GnRH antagonist protocol for women with different AMH, Age and BMI (before PS matching) (the GnRH antagonist protocol group as a reference)

|            |                       | Before matching         |        |                         |        |
|------------|-----------------------|-------------------------|--------|-------------------------|--------|
|            |                       | Adjusted OR<br>(95% CI) | P      | Adjusted OR<br>(95% CI) | P      |
|            |                       | BMI<24.0kg/m2           |        | BMI≥24.0kg/m2           |        |
| age<30year |                       |                         |        |                         |        |
|            | AMH≤3ng/ml            | 1.12(0.79,1.58)         | 0.521  | 1.62(0.87,3.04)         | 0.131  |
|            | 3ng/ml<br><AMH<6ng/ml | 1.58(1.16,2.16)         | 0.004* | 1.07(0.63,1.84)         | 0.799  |
|            | AMH≥6ng/ml            | 1.30(0.74,2.28)         | 0.363  | 0.47(0.11,1.98)         | 0.300  |
| age≥30year |                       |                         |        |                         |        |
|            | AMH≤3ng/ml            | 1.27(0.98,1.65)         | 0.076  | 0.60(0.39,0.94)         | 0.025* |
|            | 3ng/ml<br><AMH<6ng/ml | 1.06(0.79,1.42)         | 0.698  | 1.76(1.04,2.98)         | 0.034* |
|            | AMH≥6ng/ml            | 1.67(0.88,3.17)         | 0.118  | 0.39(0.10,1.59)         | 0.189  |

adjusting for confounders of female age, BMI, AMH, AFC, E2, FSH, LH, P, number of good quality embryos, total dose of Gn, duration of Gn.

\*Statistically significant (P < 0.05).

Supplemental Table2.

The recommendation of the GnRH agonist long-acting protocol and the GnRH antagonist protocol for infertile women who receive fresh embryo transfer after the first IVF/ICSI treatment.

|             |             | BMI<24.0kg/m <sup>2</sup>          | BMI≥ 24.0kg/m <sup>2</sup>         |
|-------------|-------------|------------------------------------|------------------------------------|
| age<30year  | AMH≤3ng/ml  | GnRH antagonist protocol           | GnRH antagonist protocol           |
|             | 3ng/ml      | GnRH agonist long-acting protocol+ | GnRH antagonist protocol           |
|             | <AMH<6ng/ml | GnRH antagonist protocol           | GnRH antagonist protocol           |
| age≥ 30year | AMH≥6ng/ml  | GnRH antagonist protocol           | GnRH antagonist protocol           |
|             | AMH≤3ng/ml  | GnRH agonist long-acting protocol+ | GnRH antagonist protocol+          |
|             | 3ng/ml      | GnRH antagonist protocol           | GnRH agonist long-acting protocol+ |
|             | <AMH<6ng/ml | GnRH antagonist protocol           | GnRH antagonist protocol           |
|             | AMH≥6ng/ml  | GnRH antagonist protocol           | GnRH antagonist protocol           |

+ represent strong recommendation
